1 **Acute infarct segmentation on diffusion-weighted image using deep**  
2 **learning algorithm and RAPID DWI: a comprehensive stroke center**  
3 **clinical validation study**

4

5 Wi-Sun Ryu, MD, PhD,<sup>1\*</sup> You-Ri Kang, MD,<sup>2\*</sup> Yoon-Gon Noh, MSc,<sup>1</sup> Jong-Hyeok Park,  
6 MSc,<sup>1</sup> Dongmin Kim PhD,<sup>1</sup> Byeong C. Kim, MD, PhD,<sup>2</sup> Man-Seok Park, MD, PhD,<sup>2</sup> Beom  
7 Joon Kim, MD, PhD,<sup>3</sup> Joon-Tae Kim, MD, PhD<sup>2</sup>

8

9 <sup>1</sup>Artificial Intelligence Research Center, JLK Inc. Seoul, Republic of Korea

10 <sup>2</sup>Department of Neurology, Chonnam National University Hospital, Chonnam National  
11 University Medical School, Gwangju, Republic of Korea

12 <sup>3</sup>Department of Neurology and Cerebrovascular Center, Seoul National University College of  
13 Medicine, Seoul National University Bundang Hospital, Seongnam-si, Republic of Korea.

14

15

16

17 \*Equally contributed to the work.

18

19 Correspondence to: Joon-Tae Kim, MD, PhD

20 Department of Neurology, Chonnam National University Medical School, Chonnam National  
21 University Hospital

22 42 Jebongro, Dong-gu, Gwangju, 61469, Korea

23 Phone: 82-62-220-6180

24 Fax: 82-62-228-3461

25 E-mail: alldelight2@jnu.ac.kr

1 **Abstract**

2 **Background** Accurate infarct volume measurement requires manual segmentation in  
3 diffusion weighted image (DWI) which is time-consuming and prone to variability. We  
4 compared two DWI infarct segmentation programs based on deep learning and the apparent  
5 diffusion coefficient threshold (JBS-01K and RAPID DWI, respectively) in a comprehensive  
6 stroke center.

7 **Method** We included 414 patients whose DWI were evaluated using RAPID DWI and JBS-  
8 01K. We used the Bland-Altman plot to compare estimated and manually segmented infarct  
9 volumes. We compared R-squared, root mean squared error, Akaike information criterion,  
10 and log likelihood after linear regression of manually segmented infarct volumes.

11 **Results** The mean age of included patients was  $70,0 \pm 12.4$  years, and 60.9% were male. The  
12 median time between the last known well and a DWI was 12.4 hours. JBS-01K segmented  
13 infarct volumes were more comparable to manually segmented volumes compared to RAPID  
14 DWI. JBS-01K had a lower root mean squared error (6.9 vs. 10.8) and log likelihood  
15 ( $p < 0.001$ ) compared to RAPID DWI. In addition, compared to RAPID DWI, JBS-01K more  
16 correctly classified patients according to the infarct volume threshold used in endovascular  
17 treatment trials (overall accuracy 98.1% vs. 94.0%;  $p = 0.002$ ). In 35 patients who received  
18 DWI prior to endovascular treatment, JBS-01K infarct volume segmentation was more  
19 closely related to manual infarct volume segmentation.

20 **Conclusion** We demonstrated that a deep learning method segmented infarct on DWI more  
21 accurately than one based on the apparent diffusion coefficient threshold.

## 1 **Introduction**

2 Diffusion weighted image (DWI) is a crucial magnetic resonance imaging (MRI) for the  
3 ischemic stroke diagnosis due to its high sensitivity to the acute lesion.<sup>1</sup> Stroke infarct  
4 volume on DWI predicts patient outcome and has utility for clinical trial outcomes.<sup>2-5</sup>

5 Although CT perfusion or CT angiography-based decisions may shorten door-to-puncture  
6 time, MRI-based decisions can provide a plethora of information, such as infarct core  
7 evaluation, hemorrhagic transformation, and the existence of an old infarct.<sup>6</sup> In addition, the  
8 development of a fast multimodal MRI protocol<sup>7</sup> and image resolution upscaling technique<sup>8</sup>  
9 may gradually permit the use of MRI-based selection for endovascular treatment.

10 In practical practice, DWI can be assessed rapidly and easily. Yet, due to artifacts, it should  
11 be compared with ADC.<sup>9</sup> Accurate infarct volume measurement requires manual  
12 segmentation of stroke boundaries in DWI which is time-consuming and prone to variability.  
13 Currently available automatic quantification tools operate in a semi-automated manner<sup>10, 11</sup> or  
14 only show a glimpse for large vessel occlusion detection in acute settings.<sup>12</sup> A study  
15 comparing established software applications in terms of apparent diffusion coefficient (ADC)  
16 lesion volume revealed that volume segmentation in different software products may lead to  
17 significantly different results in the individual patient,<sup>13</sup> which raises concerns regarding the  
18 use of software estimating infarct core using ADC for endovascular treatment candidates.

19 Accrued literature has shown promising results of deep learning algorithm in segmentation of  
20 infarct volume on DWI.<sup>14, 15</sup> A recent study demonstrated that deep learning algorithm  
21 outperformed RAPID (Rapid Processing of Perfusion and Diffusion, iSchema View Inc.) in  
22 infarct segmentation on DWI.<sup>15</sup> However, no study has evaluated their performance in a daily  
23 clinical practice. In the study, we compared two commercial DWI infarct segmentation  
24 programs (JBS-01K and RAPID DWI) in a comprehensive stroke center.

25

26

## 27 **Method**

### 28 **Study subjects**

1 This study was a retrospective analysis of a prospective, web-based stroke registry that was a  
2 component of the Clinical Research Collaboration for Stroke in Korea registry. From August  
3 2020 to April 2021, we screened all ischemic stroke patients hospitalized within 7 days to a  
4 stroke center (N = 673). Among them, we excluded 249 patients who did not perform DWI (n  
5 = 5) or their infarct volume was not measured by RAPID DWI (n = 244). Further we  
6 excluded 10 patients whose DWI acquisition time occurred before their documented stroke  
7 onset.

8

### 9 **Ethics Statements**

10 The institutional review boards of Chonnam National University Hospital authorized the  
11 collection of clinical information and imaging data in the Clinical Research Collaboration for  
12 Stroke in Korea registry with the objective of enhancing the quality of stroke care. The  
13 requirement for written informed consent from study participants was waived due to the  
14 anonymity of the individuals and the minimal risk to them.

15

### 16 **Data and Image Collection**

17 Baseline data, including NIHSS scores, were collected from all patients, and the stroke  
18 subtypes were stratified according to the TOAST criteria after complete diagnostic  
19 profiling.<sup>16</sup> Cranial DICOM images were collected and segmented by two experience  
20 vascular neurologists (JTK and WSR) and large vessel occlusion (LVO) was determined  
21 using MR angiography. We defined LVO as the occlusion of internal carotid artery or middle  
22 cerebral artery (M1 or M2). The location of an infarct was classified as supratentorial if  
23 ischemic lesions were present in the cerebral hemispheres and as infratentorial if the lesions  
24 were located in the brainstem and cerebellum. Using tertile, the infarct size was classified as  
25 small (0 - 0.87 mL), medium (0.88 - 6.13 mL), and large (6.14 - 393.4 mL).

26

### 27 **Infarct Segmentation Programs**

28 Two commercially available programs were used to process the DWI. RAPID DWI is an  
29 automatic infarct segmentation program based on threshold ADC value. JBS-01K (JLK Inc.)

1 is an automatic ischemic lesion software using 3D U-net deep learning algorithm.<sup>15</sup> See the  
2 supplementary material for more details. Briefly, RAPID uses the ADC threshold ( $620$   
3  $\times 10^{-6}$  mm<sup>2</sup>/s) to estimate infarcted area. The JBS-01K employs deep learning algorithm  
4 trained with approximately 8,000 DWIs in which infarct areas were manually segmented by  
5 experts.

6

## 7 **Statistical Analysis**

8 Comparing baseline characteristics between included and excluded subjects using the t test,  
9 rank-sum test, or chi-squares test, as appropriate. We examined the relationship between  
10 estimated infarct volumes and manually segmented infarct volumes using Pearson's  
11 correlation analysis. We used Dice similarity coefficient to evaluate the inter-rater agreement  
12 of lesion segmentation in 20 cases randomly selected. Dice similarity coefficient was  
13 calculated as follows.

$$DSC \text{ (Dice similarity coefficient)} = \frac{2|A \cap B|}{|A| + |B|}$$

14 To assess the segmentation performance of JBS-01K, the dice similarity coefficient between  
15 JBS-01K and manually segmented infarct areas was determined. We used the Bland-Altman  
16 plot of automatically segmented infarct volumes by software vs manually segmented infarct  
17 volumes. In the Bland-Altman plot the percent difference was calculated as follows.

$$\%Difference = \frac{(Ground\ truth\ volume - estimated\ volume)}{(Ground\ truth\ volume + estimated\ volume)/2} \times 100$$

18 In addition, we assessed and compared R-squared, root mean squared error, Akaike  
19 information criteria, and log likelihood following linear regression analysis of automatically  
20 and manually segmented infarct volumes. We reanalyzed infarct volumes after stratification  
21 according to large vessel occlusion, infarct volume, infarct location, and time from LKW to  
22 imaging. To evaluate the accuracy of patient classification according to endovascular  
23 treatment clinical trial criteria, we categorized patients using time from LKW to image and  
24 manually segmented infarct volume and compared the frequency of correct classification  
25 between RAPID and JBS-01K using the chi-square test. In addition, for participants who  
26 received DWI prior to endovascular therapy (n = 35), we compared estimated infarct volumes

1 by RAPID and JBS-01K to manually segmented infarct volumes using the Bland-Altman plot  
2 and parameters derived from a linear regression analysis. A two-sided p value of less than  
3 0.05 was considered statistically significant.

4

5

## 6 **Results**

### 7 **Baseline Characteristics**

8 Among 673 patients admitted from August 2020 to April 2021, 414 patients were included  
9 for the analysis (Supplementary Figure 1). Among included patients, mean age was  $70.1 \pm 12.4$   
10 years and 60.9% were men. The included patients were older, had more severe strokes, and  
11 had atrial fibrillation and cardioembolic strokes more frequently compared with excluded  
12 patients (Table 1). In addition, included patients underwent DWI earlier than excluded  
13 patients (median 12.4 hours vs. 17.7 hours;  $p < 0.001$ ). Inter-rater dice similarity coefficient  
14 was  $0.68 \pm 0.16$  and mean volume difference was  $2.82 \pm 4.36$ .

15

### 16 **Infarct segmentation performance by deep learning algorithm versus RAPID**

17 Both RAPID DWI and JBS-01K calculating infarct volume were significantly associated  
18 with manual segmentation infarct volume using Pearson's correlation analysis (both  $\rho =$   
19 0.98). Dice similarity coefficient between JBS-01K and manual segmentation was 0.74. Dice  
20 similarity coefficient tended to increase as infarct volume increases (Supplementary Figure 2).  
21 The segmented infarct volume dot plot revealed that volumes segmented by JBS-01K were  
22 more closely related to volumes segmented manually compared with RAPID DWI (Figure 1).  
23 RAPID DWI tended to underestimate the true infarct volume in infarct volumes less than 10  
24 mL when compared to JBS-01K. (the inset in Figure 1). In addition, RAPID DWI and JBS-  
25 01K were unable to detect and segment infarct in 254 (61.6%) and 8 (1.9%;  $p < 0.001$ ) of 412  
26 patients with apparent infarct on DWI, respectively. The Bland-Altman plot also indicated  
27 that JBS-01K assessed infarct volume more accurately than RAPID DWI, regardless of  
28 infarct volume. In all patients, the mean percent difference between JBS-01K and the ground  
29 truth was 20.3% (95% confidence interval [CI], -77.4 to 118.1%), while the mean percent

1 difference between RAPID DWI and the ground truth was 110.5% (95% CI, -113.6 to  
2 334.6%).

3

#### 4 **Infarct segmentation performance by deep learning algorithm versus RAPID stratified** 5 **by large vessel occlusion, infarct volume, time from last known well to imaging, and** 6 **infarct location**

7 In all patients, JBS-01K demonstrated a lower root mean squared error (Table 2; 10.76 versus  
8 6.90) and log likelihood ( $p < 0.001$ ) than RAPID DWI. After stratification by large vessel  
9 occlusion, JBS-01K predicted infarct volume more accurately than RAPID DWI in both  
10 groups with and without large artery occlusion. In the group with small infarcts ( $< 0.87$  mL),  
11 RAPID DWI was unable of estimating infarct volume. In both the medium ( $0.89 - 6.13$  mL)  
12 and large ( $6.21 - 393.4$  mL) infarct groups, JSB-01K produced lower root mean squared error  
13 and log likelihood than RAPID DWI. In supratentorial or mixed and infratentorial infarcts,  
14 JSB-01K predicted infarct volume compared to manually segmented infarct volume  
15 demonstrated lower root mean square errors and log likelihood than RAPID DWI. In the  $< 6$   
16 hours group, infarct volume segmented by JBS-01K tended to underestimate infarct volume,  
17 whereas RAPID DWI overestimated or was unable to identify infarct (Figure 2A). In patients  
18 undergoing DWI between  $6 - 24$  hours from LKW, infarct volume segmented by JBS-01K  
19 differs markedly less from manual segmentation than RAPID DWI (Figure 2B). In the  $> 24$   
20 hours group, JBS-01K segmenting infarct volume was much more correlated to manual  
21 segmenting infarct volume than RAPID DWI.

22

#### 23 **Infarct estimation with respect to endovascular treatment decision**

24 Accuracy of patient classification in the context of DEFUSE-3 (Endovascular Therapy  
25 Following Imaging Evaluation for Ischemic Stroke), DAWN (DWI or CTP Assessment With  
26 Clinical Mismatch in the Triage of Wake-Up and Late Presenting Strokes Undergoing  
27 Neurointervention With Trevo), or EXTEND-IA (Extending the Time for Thrombolysis in  
28 Emergency Neurological Deficits With Intra-Arterial Therapy) was elaborated in  
29 supplementary table 1. Overall classification accuracy of JBS-01K was superior to RAPID

1 DWI ( $p = 0.002$  by chi-square). When applying DWAN threshold, the classification accuracy  
2 of JBS-01K was higher than RAPID ( $p = 0.007$  by chi-square).

3

#### 4 **Infarct segmentation performance by deep learning algorithm versus RAPID in patients** 5 **undergoing endovascular treatment**

6 Among 35 patients who underwent DWI before endovascular treatment, RAPID DWI was  
7 unable to predict infarct volume in 7 (20%) patients; whereas JBS-01K was unable to  
8 estimate infarct volume in 2 (5.7%). RAPID DWI tended to overestimate infarct volume  
9 whereas JBS-01K underestimated infarct volume (Figure 3). However, JBS-01K segmenting  
10 infarct volume was more closely related to manual segmenting infarct volume. Moreover, in  
11 patients with smaller infarct volume ( $< 10$  mL by manual segmentation), JBS-01K markedly  
12 outperformed RAPID DWI (the inset in Figure 3A). Simple linear regression against manual  
13 segmenting infarct volume also showed that JBS-01K had smaller root mean squared error  
14 and log likelihood ( $p < 0.001$ ) compared with RAPID DWI (Supplementary Table 2). The  
15 Bland-Altman plot revealed that the mean percent difference was lower in RAPID than in  
16 JBS-01K; however, the 95% CI was wider in RAPID than in JBS-01K, indicating estimation  
17 inconsistency.

18

19

## 20 **Discussion**

21 In acute ischemic stroke patients, we demonstrated that automated ischemic lesion  
22 segmentation on DWI by a deep learning algorithm (JBS-01K) outperformed RAPID DWI.  
23 After stratification by LKW to imaging, infarct volume, and infarct location, the deep  
24 learning method segmented infarct volume consistently better than RAPID DWI. In addition,  
25 in patients who received endovascular treatment, the deep learning algorithm segmented the  
26 infarct area more effectively than RAPID DWI. These results indicate that segmentation of  
27 lesions on DWI using a deep learning algorithm can be applied effectively in clinical practice.

28 In the present study, JBS-01K estimated infarct volume on DWI more accurately than RAPID  
29 DWI (Supplementary Fig 3). Notably, RAPID DWI underestimated or even failed to detect



1 small ischemic lesion when compared to JBS-01K. In line with a recent study, it is possible  
2 that the deep learning model outperforms simple ADC thresholding by identifying ischemic  
3 lesion with subtle ADC decrease.<sup>17</sup> Varying stroke pathophysiological mechanisms and stroke  
4 work flow, such as stroke subtypes, time from LKW to imaging, and age, due to different  
5 study populations across studies utilizing RAPID and ours could also account for the results.

6 Clinical trials on endovascular treatment for patients with large vessel occlusion have  
7 extended the intervention window for stroke,<sup>4, 5</sup> increasing more patients eligible. Like a  
8 history of intravenous thrombolysis,<sup>18</sup> current efforts have focused to expand the candidate  
9 pool for endovascular treatment to include distal or M2 middle cerebral artery occlusion<sup>19, 20</sup>  
10 and basilar artery occlusion.<sup>21</sup> As the effort continues, more precise infarct segmentation  
11 solutions that can segment both small and posterior circulation infarcts will be required. In  
12 the current study, the deep learning solution outperformed RAPID DWI in small infarct core  
13 and infratentorial stroke, indicating that, at least for MRI-guided revascularization decisions,  
14 the deep learning solution is superior to the ADC threshold-based solution.

15 In clinical trials and the real world, computed tomography (CT) perfusion or angiography is  
16 the mainstay due to its faster scan time.<sup>4, 5, 22, 23</sup> It has been hypothesized that CT-based  
17 decision making improves clinical outcome compared to MRI-based decision making since  
18 the time between stroke onset and reperfusion is the most crucial factor in determining stroke  
19 patients' outcomes.<sup>24</sup> Nonetheless, accumulating evidence from real-world data has  
20 demonstrated that decisions based on MRI are not inferior to those based on CT,<sup>22, 23, 25</sup>  
21 despite not having been demonstrated in randomized clinical trials. In addition, precise infarct  
22 segmentation without inter- or intra-rater variability enables investigations on serial DWIs,  
23 infarct progression prediction, and infarct–functional anatomy connection. Hence, we  
24 anticipated that a precise infarct segmentation method based on deep learning may be  
25 employed in the future to further our understanding of stroke pathophysiology utilizing DWI.

26 Infarct volumes on DWI correlate with functional outcome<sup>26</sup> and early neurological  
27 deterioration.<sup>27</sup> In addition, recent research has demonstrated that the pattern of infarct on  
28 DWI is predictive of recurrent stroke.<sup>28, 29</sup> To validate and expand our understanding of DWI,  
29 a large dataset with precise infarct segmentation is required. Nevertheless, manual or semi-  
30 automated lesion segmentation is time-consuming and expensive. The technique for

1 automated infarct segmentation demonstrated in this study may fulfill unmet needs in clinical  
2 and research fields of stroke.

3 Our study has a few of limitations. Patients were obtained from a single comprehensive  
4 stroke center, so it is possible that they do not accurately represent patients with suspected  
5 stroke admitted to smaller community hospitals. In the study population, a short time interval  
6 between LKW and imaging may underestimate the performance of RAPID DWI that  
7 utilized the apparent diffusion coefficient threshold. In addition, because the included patients  
8 had more severe strokes and a shorter time between LKW and imaging acquisition, the results  
9 should be interpreted with caution in the broader population of stroke patients.

10 In a real-world stroke cohort from a single comprehensive center, we proved that a deep  
11 learning method segmented infarct on DWI more accurately than one based on the apparent  
12 diffusion coefficient threshold. In the rapidly evolving clinical and research fields of stroke,  
13 infarct segmentation using deep learning could be a useful tool for rescuing more patients  
14 with recanalization therapy and advancing our understanding of stroke imaging.

## 1 **Acknowledgement**

2 This research was supported by a grant of the Korea Health Technology R&D Project through  
3 the Korea Health Industry Development Institute (KHIDI), funded by the Ministry of Health  
4 & Welfare, Republic of Korea (grant number: HR20C0021) and the Multiminity Grant for  
5 Medical Device Development (KMDF\_PR\_20200901\_0098) of National Research  
6 Foundation, funded by the Korean government.

7

8

## 9 **References**

- 10 1. Albers GW. Diffusion-weighted MRI for evaluation of acute stroke. *Neurology*. 1998;51(3 Suppl  
11 3):S47-9.
- 12 2. Thijs VN, Lansberg MG, Beaulieu C, Marks MP, Moseley ME, Albers GW. Is early ischemic lesion  
13 volume on diffusion-weighted imaging an independent predictor of stroke outcome? A multivariable  
14 analysis. *Stroke*. 2000;31(11):2597-602.
- 15 3. Bang OY, Lee PH, Heo KG, Joo US, Yoon SR, Kim SY. Specific DWI lesion patterns predict  
16 prognosis after acute ischaemic stroke within the MCA territory. *J Neurol Neurosurg Psychiatry*.  
17 2005;76(9):1222-8.
- 18 4. Nogueira RG, Jadhav AP, Haussen DC, et al. Thrombectomy 6 to 24 Hours after Stroke with a  
19 Mismatch between Deficit and Infarct. *N Engl J Med*. 2018;378(1):11-21.
- 20 5. Albers GW, Marks MP, Kemp S, et al. Thrombectomy for Stroke at 6 to 16 Hours with Selection by  
21 Perfusion Imaging. *N Engl J Med*. 2018;378(8):708-718.
- 22 6. Boned S, Padroni M, Rubiera M, et al. Admission CT perfusion may overestimate initial infarct  
23 core: the ghost infarct core concept. *J Neurointerv Surg*. 2017;9(1):66-69.
- 24 7. Nael K, Khan R, Choudhary G, et al. Six-minute magnetic resonance imaging protocol for  
25 evaluation of acute ischemic stroke: pushing the boundaries. *Stroke*. 2014;45(7):1985-91.
- 26 8. Chung H, Lee ES, Ye JC. MR Image Denoising and Super-Resolution Using Regularized Reverse  
27 Diffusion. *IEEE Trans Med Imaging*. 2022;PP
- 28 9. Le Bihan D, Poupon C, Amadon A, Lethimonnier F. Artifacts and pitfalls in diffusion MRI. *J Magn  
29 Reson Imaging*. 2006;24(3):478-88.
- 30 10. Mah YH, Jager R, Kennard C, Husain M, Nachev P. A new method for automated high-  
31 dimensional lesion segmentation evaluated in vascular injury and applied to the human occipital lobe.  
32 *Cortex*. 2014;56(100):51-63.

- 1 11. Dwyer MG, Bergsland N, Saluste E, et al. Application of hidden Markov random field approach  
2 for quantification of perfusion/diffusion mismatch in acute ischemic stroke. *Neurol Res.*  
3 2008;30(8):827-34.
- 4 12. Kakuda W, Lansberg MG, Thijs VN, et al. Optimal definition for PWI/DWI mismatch in acute  
5 ischemic stroke patients. *J Cereb Blood Flow Metab.* 2008;28(5):887-91.
- 6 13. Deutschmann H, Hinteregger N, Wiesspeiner U, et al. Automated MRI perfusion-diffusion  
7 mismatch estimation may be significantly different in individual patients when using different  
8 software packages. *Eur Radiol.* 2021;31(2):658-665.
- 9 14. Zoetmulder R, Konduri PR, Obdeijn IV, et al. Automated Final Lesion Segmentation in Posterior  
10 Circulation Acute Ischemic Stroke Using Deep Learning. *Diagnostics (Basel).* 2021;11(9)
- 11 15. Kim YC, Lee JE, Yu I, et al. Evaluation of Diffusion Lesion Volume Measurements in Acute  
12 Ischemic Stroke Using Encoder-Decoder Convolutional Network. *Stroke.* 2019;50(6):1444-1451.
- 13 16. Ko Y, Lee S, Chung JW, et al. MRI-based Algorithm for Acute Ischemic Stroke Subtype  
14 Classification. *J Stroke.* 2014;16(3):161-72.
- 15 17. Nazari-Farsani S, Yu Y, Duarte Armindo R, et al. Predicting final ischemic stroke lesions from  
16 initial diffusion-weighted images using a deep neural network. *Neuroimage Clin.* 2022;37:103278.
- 17 18. Hacke W, Kaste M, Bluhmki E, et al. Thrombolysis with alteplase 3 to 4.5 hours after acute  
18 ischemic stroke. *N Engl J Med.* 2008;359(13):1317-29.
- 19 19. Menon BK, Hill MD, Davalos A, et al. Efficacy of endovascular thrombectomy in patients with  
20 M2 segment middle cerebral artery occlusions: meta-analysis of data from the HERMES  
21 Collaboration. *J Neurointerv Surg.* 2019;11(11):1065-1069.
- 22 20. Almekhlafi M, Ospel JM, Saposnik G, et al. Endovascular Treatment Decisions in Patients with  
23 M2 Segment MCA Occlusions. *AJNR Am J Neuroradiol.* 2020;41(2):280-285.
- 24 21. Tao C, Nogueira RG, Zhu Y, et al. Trial of Endovascular Treatment of Acute Basilar-Artery  
25 Occlusion. *N Engl J Med.* 2022;387(15):1361-1372.
- 26 22. Krebs S, Posekany A, Pilz A, et al. CT- versus MRI-Based Imaging for Thrombolysis and  
27 Mechanical Thrombectomy in Ischemic Stroke: Analysis from the Austrian Stroke Registry. *J Stroke.*  
28 2022;24(3):383-389.
- 29 23. Kim JT, Cho BH, Choi KH, et al. Magnetic Resonance Imaging Versus Computed Tomography  
30 Angiography Based Selection for Endovascular Therapy in Patients With Acute Ischemic Stroke.  
31 *Stroke.* 2019;50(2):365-372.
- 32 24. Mazighi M, Chaudhry SA, Ribo M, et al. Impact of onset-to-reperfusion time on stroke mortality:  
33 a collaborative pooled analysis. *Circulation.* 2013;127(19):1980-5.
- 34 25. Schellinger PD, Thomalla G, Fiehler J, et al. MRI-based and CT-based thrombolytic therapy in  
35 acute stroke within and beyond established time windows: an analysis of 1210 patients. *Stroke.*

- 1 2007;38(10):2640-5.
- 2 26. Petersen NH, Ortega-Gutierrez S, Wang A, et al. Decreases in Blood Pressure During
- 3 Thrombectomy Are Associated With Larger Infarct Volumes and Worse Functional Outcome. *Stroke*.
- 4 2019;50(7):1797-1804.
- 5 27. Terasawa Y, Iguchi Y, Kimura K, et al. Neurological deterioration in small vessel disease may be
- 6 associated with increase of infarct volume. *J Neurol Sci*. 2008;269(1-2):35-40.
- 7 28. Raghuram K, Durgam A, Kohlnhofer J, Singh A. Relationship between stroke recurrence, infarct
- 8 pattern, and vascular distribution in patients with symptomatic intracranial stenosis. *J Neurointerv*
- 9 *Surg*. 2018;10(12):1161-1163.
- 10 29. Prabhakaran S, Liebeskind DS, Cotsonis G, et al. Predictors of Early Infarct Recurrence in
- 11 Patients With Symptomatic Intracranial Atherosclerotic Disease. *Stroke*. 2021;52(6):1961-1966.

Table 1. Baseline characteristics comparison between included and excluded patients

|                                                 | Included<br>(n = 414) | Excluded<br>(n = 259)          | P value             |
|-------------------------------------------------|-----------------------|--------------------------------|---------------------|
| Age, years                                      | 70.1±12.4             | 68.1±12.4                      | 0.04                |
| Sex, men                                        | 252 (60.9%)           | 158 (61.0%)                    | 0.97                |
| Admission NIHSS scores, median (IQR)            | 3 (1 – 7)             | 1 (0 – 4)                      | <0.001 <sup>a</sup> |
| Previous stroke                                 | 70 (16.9%)            | 53 (20.5%)                     | 0.25                |
| Hypertension                                    | 236 (57.0%)           | 153 (59.1%)                    | 0.60                |
| Diabetes                                        | 136 (32.9%)           | 75 (29.0%)                     | 0.29                |
| Hyperlipidemia                                  | 61 (14.7%)            | 41 (15.8%)                     | 0.70                |
| Current smoking                                 | 101 (24.4%)           | 69 (26.6%)                     | 0.51                |
| Coronary artery disease                         | 52 (12.6%)            | 30 (11.6%)                     | 0.71                |
| Atrial fibrillation                             | 109 (26.3%)           | 45 (17.4%)                     | 0.007               |
| Subtype                                         |                       |                                | 0.003               |
| Large artery atherosclerosis                    | 125 (30.2%)           | 107 (41.3%)                    |                     |
| Small vessel occlusion                          | 57 (13.8%)            | 27 (10.4%)                     |                     |
| Cardioembolism                                  | 89 (21.5%)            | 32 (12.4%)                     |                     |
| Undetermined                                    | 138 (33.3%)           | 87 (33.6%)                     |                     |
| Other-determined                                | 5 (1.2%)              | 6 (2.3%)                       |                     |
| Time from LKW to admission, hours, median (IQR) | 8.8 (3.0 – 20.5)      | 12.6 (3.4 – 44.8)              | 0.001 <sup>a</sup>  |
| Time from LKW to image, hours, median (IQR)     | 12.4 (5.2 – 28.3)     | 17.7 (7.9 – 56.4) <sup>b</sup> | <0.001 <sup>a</sup> |
| Intravenous thrombolysis                        | 52 (12.6%)            | 22 (8.5%)                      | 0.10                |
| Endovascular treatment                          | 40 (9.7%)             | 20 (7.7%)                      | 0.39                |

Data were presented as mean±SD, median (interquartile range), or number (percentage).

<sup>a</sup>Rank-sum test was used.

<sup>b</sup>Data were missing in 15 patients.

NIHSS=National Institute Health Stroke Scale; IQR=interquartile range; LKW=last known well

Table 2. Comparison between JBS-01K and RAPID stratified by large vessel occlusion, infarct volume, and location using linear regression

|                                   |                    | R-squared | Root mean squared error | Akaike information criterion | Log likelihood | P value <sup>a</sup> |
|-----------------------------------|--------------------|-----------|-------------------------|------------------------------|----------------|----------------------|
| All patients                      | JBS-01K            | 0.97      | 6.90                    | 2905.47                      | -1450.74       | < 0.001              |
|                                   | RAPID              | 0.97      | 10.76                   | 3144.36                      | -1570.18       |                      |
| Acute LVO<br>No (n = 374)         | JBS-01K            | 0.97      | 6.84                    | 2668.66                      | -1332.33       | < 0.001              |
|                                   | RAPID              | 0.97      | 10.04                   | 2848.26                      | -1422.13       |                      |
| Yes (n = 40)                      | JBS-01K            | 0.94      | 7.32                    | 299.86                       | -147.93        | < 0.001              |
|                                   | RAPID              | 0.88      | 15.00                   | 348.65                       | -172.32        |                      |
| Infarct volume                    |                    |           |                         |                              |                |                      |
| Small (n = 141, 0 – 0.87mL)       | JBS-01K            | 0.50      | 0.20                    | -45.82                       | 24.91          | NA                   |
|                                   | RAPID <sup>b</sup> | NA        | NA                      | NA                           | NA             |                      |
| Medium (n = 141, 0.89 – 6.13mL)   | JBS-01K            | 0.60      | 0.86                    | 360.00                       | -178.00        | < 0.001              |
|                                   | RAPID              | 0.14      | 3.78                    | 777.13                       | -386.56        |                      |
| Large (n = 142, 6.21 – 393.4mL)   | JBS-01K            | 0.96      | 11.91                   | 1150.08                      | -573.04        | < 0.001              |
|                                   | RAPID              | 0.95      | 17.98                   | 1225.58                      | -610.79        |                      |
| Infarct location                  |                    |           |                         |                              |                |                      |
| Supratentorial or mixed (n = 346) | JBS-01K            | 0.97      | 8.76                    | 2485.54                      | -1240.77       | < 0.001              |
|                                   | RAPID              | 0.97      | 11.66                   | 2683.57                      | -1339.79       |                      |
| Infratentorial (n = 78)           | JBS-01K            | 0.99      | 1.92                    | 325.44                       | -160.72        | < 0.001              |
|                                   | RAPID              | 0.98      | 3.98                    | 438.84                       | -217.4         |                      |

<sup>a</sup>P value for likelihood difference

<sup>b</sup>Unable to do regression analysis on patients with a small infarct volume since RAPID evaluated the infarct volume to be 0.

NA=not available



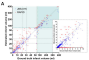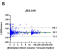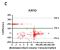

200000

200000

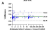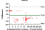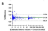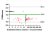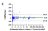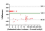

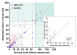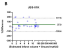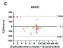

Source: https://www.medrxiv.org/content/medrxiv/early/2023/02/23/2023.02.20.23286140.full.pdf
